# Supplementary material
Source: Springer Nature journal article supplement (https://www.springermedizin.de/resource/supplementary/12961_2013_327_MOESM1_ESM.pdf/9571046)

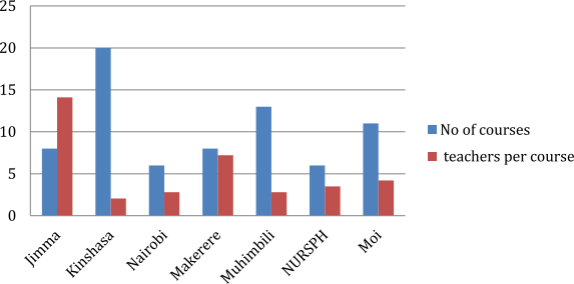

Supplement: MOESM1 [file 9571046]
